# Supplementary material
Source: publisher figshare collection journal article supplement (https://karger.figshare.com/ndownloader/files/12802316)
Supplement: Supplementary file 1 [file 12802316]

## **Supplementary Material**

# **miR-122-5p Inhibits the Proliferation, Invasion and Growth of Bile Duct Carcinoma Cells by Targeting ALDOA**

Zhuo Xu<sup>a</sup> Guangchao Liu<sup>a</sup> Meng Zhang<sup>a</sup> Zhilei Zhang<sup>a</sup> Yuming Jia<sup>a</sup> Li Peng<sup>a</sup> Yanhong Zhu<sup>b</sup>  
Jianbin Hu<sup>b</sup> Runying Huang<sup>b</sup> Xiaonan Sun<sup>b</sup>

<sup>a</sup>Department of Hepatobiliary Surgery, Fourth Hospital of Hebei Medical University, Shijiazhuang, Hebei, <sup>b</sup>Department of Radiation Oncology, Sir Run Run Shaw Hospital, College of Medicine, Zhejiang University, Hangzhou, China

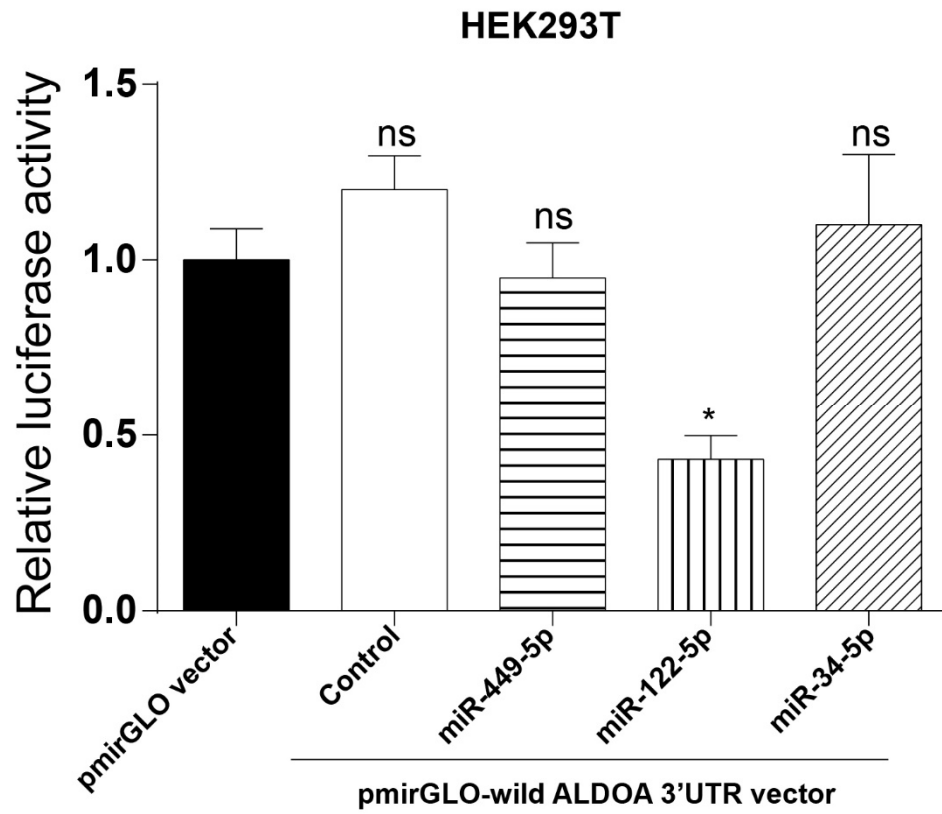

**Figure S1.** Dual luciferase report assay verified the target relationships between *ALDOA* 3'UTR and the 3 miRNAs. MiR-122-5p showed the most significant effects while the other two miRNAs created no significant disturbance.
